# Supplementary material for: Assessment of risk based on variant pathways and establishment of an artificial neural network model of thyroid cancer
Source: BMC Med Genet. 2019 May 28;20:92. doi: 10.1186/s12881-019-0829-4 (PMC6537382; doi:10.1186/s12881-019-0829-4)
Supplement: Supplementary file 2 — Table S2. The clinical information of thyroid cancer samples downloaded from the GEO database. (XLSX 25 kb) [file 12881_2019_829_MOESM2_ESM.xlsx]

## Sheet: Sheet1
Supplementary Table 2 The clinical information of thyroid cancer samples downloaded from the GEO database （Supplementary Table 2）
Accession	Title	Source name	Tissue	Cytology	Histology	Gender	Characteristics
GSM846410	V010001_I_B	Thyroid FNA, cytology I, histology B	thyroid nodule	indeterminate	benign	male	patient age (yrs): 59
GSM846411	V010002_I_B	Thyroid FNA, cytology I, histology B	thyroid nodule	indeterminate	benign	female	patient age (yrs): 31
GSM846412	V010003_M_M	Thyroid FNA, cytology M, histology M	thyroid nodule	malignant	malignant	male	patient age (yrs): 47
GSM846413	V010004_I_B	Thyroid FNA, cytology I, histology B	thyroid nodule	indeterminate	benign	female	patient age (yrs): 64
GSM846414	V010005_I_B	Thyroid FNA, cytology I, histology B	thyroid nodule	indeterminate	benign	male	patient age (yrs): 63
GSM846415	V010006_I_B	Thyroid FNA, cytology I, histology B	thyroid nodule	indeterminate	benign	female	patient age (yrs): 47
GSM846416	V010007_B_B	Thyroid FNA, cytology B, histology B	thyroid nodule	benign	benign	male	patient age (yrs): 42
GSM846417	V010008_I_M	Thyroid FNA, cytology I, histology M	thyroid nodule	indeterminate	malignant	male	patient age (yrs): 58
GSM846418	V010009_I_M	Thyroid FNA, cytology I, histology M	thyroid nodule	indeterminate	malignant	female	patient age (yrs): 85
GSM846419	V010010_M_M	Thyroid FNA, cytology M, histology M	thyroid nodule	malignant	malignant	female	patient age (yrs): 29
GSM846420	V010011_M_M	Thyroid FNA, cytology M, histology M	thyroid nodule	malignant	malignant	female	patient age (yrs): 40
GSM846421	V010012_M_M	Thyroid FNA, cytology M, histology M	thyroid nodule	malignant	malignant	female	patient age (yrs): 22
GSM846422	V010013_I_B	Thyroid FNA, cytology I, histology B	thyroid nodule	indeterminate	benign	female	patient age (yrs): 44
GSM846423	V010014_I_B	Thyroid FNA, cytology I, histology B	thyroid nodule	indeterminate	benign	female	patient age (yrs): 38
GSM846424	V010015_I_B	Thyroid FNA, cytology I, histology B	thyroid nodule	indeterminate	benign	female	patient age (yrs): 55
GSM846425	V010016_I_M	Thyroid FNA, cytology I, histology M	thyroid nodule	indeterminate	malignant	male	patient age (yrs): 62
GSM846426	V010017_M_M	Thyroid FNA, cytology M, histology M	thyroid nodule	malignant	malignant	female	patient age (yrs): 43
GSM846427	V010018_I_B	Thyroid FNA, cytology I, histology B	thyroid nodule	indeterminate	benign	female	patient age (yrs): 53
GSM846428	V010019_I_M	Thyroid FNA, cytology I, histology M	thyroid nodule	indeterminate	malignant	male	patient age (yrs): 28
GSM846429	V010020_M_M	Thyroid FNA, cytology M, histology M	thyroid nodule	malignant	malignant	female	patient age (yrs): 60
GSM846430	V010021_I_B	Thyroid FNA, cytology I, histology B	thyroid nodule	indeterminate	benign	female	patient age (yrs): 36
GSM846431	V010022_B_B	Thyroid FNA, cytology B, histology B	thyroid nodule	benign	benign	female	patient age (yrs): 54
GSM846432	V010023_I_M	Thyroid FNA, cytology I, histology M	thyroid nodule	indeterminate	malignant	female	patient age (yrs): 56
GSM846433	V010024_M_M	Thyroid FNA, cytology M, histology M	thyroid nodule	malignant	malignant	male	patient age (yrs): 80
GSM846434	V010025_I_B	Thyroid FNA, cytology I, histology B	thyroid nodule	indeterminate	benign	female	patient age (yrs): 64
GSM846435	V010026_I_B	Thyroid FNA, cytology I, histology B	thyroid nodule	indeterminate	benign	male	patient age (yrs): 62
GSM846436	V010027_I_M	Thyroid FNA, cytology I, histology M	thyroid nodule	indeterminate	malignant	female	patient age (yrs): 61
GSM846437	V010028_M_M	Thyroid FNA, cytology M, histology M	thyroid nodule	malignant	malignant	female	patient age (yrs): 33
GSM846438	V010029_I_M	Thyroid FNA, cytology I, histology M	thyroid nodule	indeterminate	malignant	female	patient age (yrs): 42
GSM846439	V010030_I_B	Thyroid FNA, cytology I, histology B	thyroid nodule	indeterminate	benign	female	patient age (yrs): 58
GSM846440	V010031_I_B	Thyroid FNA, cytology I, histology B	thyroid nodule	indeterminate	benign	female	patient age (yrs): 25
GSM846441	V010032_I_B	Thyroid FNA, cytology I, histology B	thyroid nodule	indeterminate	benign	male	patient age (yrs): 62
GSM846442	V010033_I_B	Thyroid FNA, cytology I, histology B	thyroid nodule	indeterminate	benign	female	patient age (yrs): 67
GSM846443	V010034_I_B	Thyroid FNA, cytology I, histology B	thyroid nodule	indeterminate	benign	female	patient age (yrs): 51
GSM846444	V010035_I_B	Thyroid FNA, cytology I, histology B	thyroid nodule	indeterminate	benign	female	patient age (yrs): 56
GSM846445	V010036_I_B	Thyroid FNA, cytology I, histology B	thyroid nodule	indeterminate	benign	female	patient age (yrs): 69
GSM846446	V010037_B_B	Thyroid FNA, cytology B, histology B	thyroid nodule	benign	benign	male	patient age (yrs): 66
GSM846447	V010038_I_M	Thyroid FNA, cytology I, histology M	thyroid nodule	indeterminate	malignant	male	patient age (yrs): 45
GSM846448	V010039_I_B	Thyroid FNA, cytology I, histology B	thyroid nodule	indeterminate	benign	female	patient age (yrs): 69
GSM846449	V010040_I_B	Thyroid FNA, cytology I, histology B	thyroid nodule	indeterminate	benign	male	patient age (yrs): 60
GSM846450	V010041_M_M	Thyroid FNA, cytology M, histology M	thyroid nodule	malignant	malignant	female	patient age (yrs): 30
GSM846451	V010042_I_B	Thyroid FNA, cytology I, histology B	thyroid nodule	indeterminate	benign	male	patient age (yrs): 47
GSM846452	V010043_I_M	Thyroid FNA, cytology I, histology M	thyroid nodule	indeterminate	malignant	female	patient age (yrs): 41
GSM846453	V010044_I_B	Thyroid FNA, cytology I, histology B	thyroid nodule	indeterminate	benign	female	patient age (yrs): 46
GSM846454	V010045_I_B	Thyroid FNA, cytology I, histology B	thyroid nodule	indeterminate	benign	female	patient age (yrs): 37
GSM846455	V010046_I_B	Thyroid FNA, cytology I, histology B	thyroid nodule	indeterminate	benign	male	patient age (yrs): 40
GSM846456	V010047_I_B	Thyroid FNA, cytology I, histology B	thyroid nodule	indeterminate	benign	female	patient age (yrs): 55
GSM846457	V010048_B_B	Thyroid FNA, cytology B, histology B	thyroid nodule	benign	benign	male	patient age (yrs): 51
GSM846458	V010049_I_M	Thyroid FNA, cytology I, histology M	thyroid nodule	indeterminate	malignant	female	patient age (yrs): 55
GSM846459	V010050_M_M	Thyroid FNA, cytology M, histology M	thyroid nodule	malignant	malignant	female	patient age (yrs): 22
GSM846460	V010051_I_B	Thyroid FNA, cytology I, histology B	thyroid nodule	indeterminate	benign	female	patient age (yrs): 55
GSM846461	V010052_M_M	Thyroid FNA, cytology M, histology M	thyroid nodule	malignant	malignant	female	patient age (yrs): 35
GSM846462	V010053_I_B	Thyroid FNA, cytology I, histology B	thyroid nodule	indeterminate	benign	female	patient age (yrs): 55
GSM846463	V010054_I_B	Thyroid FNA, cytology I, histology B	thyroid nodule	indeterminate	benign	female	patient age (yrs): 56
GSM846464	V010055_I_B	Thyroid FNA, cytology I, histology B	thyroid nodule	indeterminate	benign	male	patient age (yrs): 44
GSM846465	V010056_I_B	Thyroid FNA, cytology I, histology B	thyroid nodule	indeterminate	benign	female	patient age (yrs): 29
GSM846466	V010057_I_B	Thyroid FNA, cytology I, histology B	thyroid nodule	indeterminate	benign	male	patient age (yrs): 43
GSM846467	V010058_I_B	Thyroid FNA, cytology I, histology B	thyroid nodule	indeterminate	benign	female	patient age (yrs): 50
GSM846468	V010059_B_B	Thyroid FNA, cytology B, histology B	thyroid nodule	benign	benign	female	patient age (yrs): 57
GSM846469	V010060_B_B	Thyroid FNA, cytology B, histology B	thyroid nodule	benign	benign	male	patient age (yrs): 67
GSM846470	V010061_I_B	Thyroid FNA, cytology I, histology B	thyroid nodule	indeterminate	benign	female	patient age (yrs): 36
GSM846471	V010062_I_B	Thyroid FNA, cytology I, histology B	thyroid nodule	indeterminate	benign	female	patient age (yrs): 48
GSM846472	V010063_I_B	Thyroid FNA, cytology I, histology B	thyroid nodule	indeterminate	benign	female	patient age (yrs): 66
GSM846473	V010064_I_B	Thyroid FNA, cytology I, histology B	thyroid nodule	indeterminate	benign	female	patient age (yrs): 68
GSM846474	V010065_I_B	Thyroid FNA, cytology I, histology B	thyroid nodule	indeterminate	benign	male	patient age (yrs): 37
GSM846475	V010066_M_M	Thyroid FNA, cytology M, histology M	thyroid nodule	malignant	malignant	male	patient age (yrs): 74
GSM846476	V010067_M_M	Thyroid FNA, cytology M, histology M	thyroid nodule	malignant	malignant	female	patient age (yrs): 74
GSM846477	V010068_B_B	Thyroid FNA, cytology B, histology B	thyroid nodule	benign	benign	female	patient age (yrs): 53
GSM846478	V010069_I_M	Thyroid FNA, cytology I, histology M	thyroid nodule	indeterminate	malignant	female	patient age (yrs): 66
GSM846479	V010070_I_M	Thyroid FNA, cytology I, histology M	thyroid nodule	indeterminate	malignant	female	patient age (yrs): 28
GSM846480	V010071_B_B	Thyroid FNA, cytology B, histology B	thyroid nodule	benign	benign	male	patient age (yrs): 74
GSM846481	V010072_I_M	Thyroid FNA, cytology I, histology M	thyroid nodule	indeterminate	malignant	male	patient age (yrs): 39
GSM846482	V010073_B_B	Thyroid FNA, cytology B, histology B	thyroid nodule	benign	benign	female	patient age (yrs): 48
GSM846483	V010074_M_M	Thyroid FNA, cytology M, histology M	thyroid nodule	malignant	malignant	female	patient age (yrs): 49
GSM846484	V010075_B_B	Thyroid FNA, cytology B, histology B	thyroid nodule	benign	benign	male	patient age (yrs): 48
GSM846485	V010076_M_M	Thyroid FNA, cytology M, histology M	thyroid nodule	malignant	malignant	female	patient age (yrs): 25
GSM846486	V010077_I_M	Thyroid FNA, cytology I, histology M	thyroid nodule	indeterminate	malignant	male	patient age (yrs): 37
GSM846487	V010078_I_B	Thyroid FNA, cytology I, histology B	thyroid nodule	indeterminate	benign	female	patient age (yrs): 66
GSM846488	V010079_I_B	Thyroid FNA, cytology I, histology B	thyroid nodule	indeterminate	benign	female	patient age (yrs): 51
GSM846489	V010080_M_M	Thyroid FNA, cytology M, histology M	thyroid nodule	malignant	malignant	female	patient age (yrs): 49
GSM846490	V010081_I_M	Thyroid FNA, cytology I, histology M	thyroid nodule	indeterminate	malignant	female	patient age (yrs): 66
GSM846491	V010082_M_M	Thyroid FNA, cytology M, histology M	thyroid nodule	malignant	malignant	female	patient age (yrs): 56
GSM846492	V010083_I_B	Thyroid FNA, cytology I, histology B	thyroid nodule	indeterminate	benign	male	patient age (yrs): 70
GSM846493	V010084_I_B	Thyroid FNA, cytology I, histology B	thyroid nodule	indeterminate	benign	female	patient age (yrs): 53
GSM846494	V010085_I_M	Thyroid FNA, cytology I, histology M	thyroid nodule	indeterminate	malignant	female	patient age (yrs): 65
GSM846495	V010086_I_M	Thyroid FNA, cytology I, histology M	thyroid nodule	indeterminate	malignant	male	patient age (yrs): 39
GSM846496	V010087_M_M	Thyroid FNA, cytology M, histology M	thyroid nodule	malignant	malignant	female	patient age (yrs): 64
GSM846497	V010088_I_M	Thyroid FNA, cytology I, histology M	thyroid nodule	indeterminate	malignant	female	patient age (yrs): 55
GSM846498	V010089_I_B	Thyroid FNA, cytology I, histology B	thyroid nodule	indeterminate	benign	female	patient age (yrs): 70
GSM846499	V010090_I_B	Thyroid FNA, cytology I, histology B	thyroid nodule	indeterminate	benign	female	patient age (yrs): 59
GSM846500	V010091_I_B	Thyroid FNA, cytology I, histology B	thyroid nodule	indeterminate	benign	female	patient age (yrs): 62
GSM846501	V010092_I_M	Thyroid FNA, cytology I, histology M	thyroid nodule	indeterminate	malignant	female	patient age (yrs): 51
GSM846502	V010093_M_M	Thyroid FNA, cytology M, histology M	thyroid nodule	malignant	malignant	female	patient age (yrs): 30
GSM846503	V010094_I_M	Thyroid FNA, cytology I, histology M	thyroid nodule	indeterminate	malignant	male	patient age (yrs): 39
GSM846504	V010095_I_B	Thyroid FNA, cytology I, histology B	thyroid nodule	indeterminate	benign	male	patient age (yrs): 61
GSM846505	V010096_B_B	Thyroid FNA, cytology B, histology B	thyroid nodule	benign	benign	female	patient age (yrs): 45
GSM846506	V010097_B_B	Thyroid FNA, cytology B, histology B	thyroid nodule	benign	benign	female	patient age (yrs): 65
GSM846507	V010098_I_B	Thyroid FNA, cytology I, histology B	thyroid nodule	indeterminate	benign	female	patient age (yrs): 50
GSM846508	V010099_I_B	Thyroid FNA, cytology I, histology B	thyroid nodule	indeterminate	benign	female	patient age (yrs): 35
GSM846509	V010100_I_B	Thyroid FNA, cytology I, histology B	thyroid nodule	indeterminate	benign	female	patient age (yrs): 64
GSM846510	V010101_I_B	Thyroid FNA, cytology I, histology B	thyroid nodule	indeterminate	benign	female	patient age (yrs): 37
GSM846511	V010102_I_B	Thyroid FNA, cytology I, histology B	thyroid nodule	indeterminate	benign	male	patient age (yrs): 66
GSM846512	V010103_I_M	Thyroid FNA, cytology I, histology M	thyroid nodule	indeterminate	malignant	female	patient age (yrs): 53
GSM846513	V010104_I_B	Thyroid FNA, cytology I, histology B	thyroid nodule	indeterminate	benign	female	patient age (yrs): 64
GSM846514	V010105_B_B	Thyroid FNA, cytology B, histology B	thyroid nodule	benign	benign	female	patient age (yrs): 47
GSM846515	V010106_I_B	Thyroid FNA, cytology I, histology B	thyroid nodule	indeterminate	benign	female	patient age (yrs): 48
GSM846516	V010107_B_B	Thyroid FNA, cytology B, histology B	thyroid nodule	benign	benign	female	patient age (yrs): 62
GSM846517	V010108_I_B	Thyroid FNA, cytology I, histology B	thyroid nodule	indeterminate	benign	female	patient age (yrs): 52
GSM846518	V010109_B_B	Thyroid FNA, cytology B, histology B	thyroid nodule	benign	benign	female	patient age (yrs): 51
GSM846519	V010110_I_B	Thyroid FNA, cytology I, histology B	thyroid nodule	indeterminate	benign	male	patient age (yrs): 73
GSM846520	V010111_I_B	Thyroid FNA, cytology I, histology B	thyroid nodule	indeterminate	benign	female	patient age (yrs): 52
GSM846521	V010112_I_M	Thyroid FNA, cytology I, histology M	thyroid nodule	indeterminate	malignant	male	patient age (yrs): 39
GSM846522	V010113_M_M	Thyroid FNA, cytology M, histology M	thyroid nodule	malignant	malignant	female	patient age (yrs): 34
GSM846523	V010114_M_M	Thyroid FNA, cytology M, histology M	thyroid nodule	malignant	malignant	female	patient age (yrs): 67
GSM846524	V010115_I_M	Thyroid FNA, cytology I, histology M	thyroid nodule	indeterminate	malignant	female	patient age (yrs): 23
GSM846525	V010116_I_M	Thyroid FNA, cytology I, histology M	thyroid nodule	indeterminate	malignant	male	patient age (yrs): 46
GSM846526	V010117_I_B	Thyroid FNA, cytology I, histology B	thyroid nodule	indeterminate	benign	female	patient age (yrs): 81
GSM846527	V010118_I_B	Thyroid FNA, cytology I, histology B	thyroid nodule	indeterminate	benign	female	patient age (yrs): 37
GSM846528	V010119_I_B	Thyroid FNA, cytology I, histology B	thyroid nodule	indeterminate	benign	female	patient age (yrs): 48
GSM846529	V010120_I_B	Thyroid FNA, cytology I, histology B	thyroid nodule	indeterminate	benign	male	patient age (yrs): 44
GSM846530	V010121_I_M	Thyroid FNA, cytology I, histology M	thyroid nodule	indeterminate	malignant	female	patient age (yrs): 51
GSM846531	V010122_I_M	Thyroid FNA, cytology I, histology M	thyroid nodule	indeterminate	malignant	female	patient age (yrs): 74
GSM846532	V010123_I_M	Thyroid FNA, cytology I, histology M	thyroid nodule	indeterminate	malignant	male	patient age (yrs): 38
GSM846533	V010124_I_M	Thyroid FNA, cytology I, histology M	thyroid nodule	indeterminate	malignant	female	patient age (yrs): 43
GSM846534	V010125_B_B	Thyroid FNA, cytology B, histology B	thyroid nodule	benign	benign	female	patient age (yrs): 53
GSM846535	V010126_I_B	Thyroid FNA, cytology I, histology B	thyroid nodule	indeterminate	benign	female	patient age (yrs): 57
GSM846536	V010127_I_M	Thyroid FNA, cytology I, histology M	thyroid nodule	indeterminate	malignant	female	patient age (yrs): 50
GSM846537	V010128_I_B	Thyroid FNA, cytology I, histology B	thyroid nodule	indeterminate	benign	female	patient age (yrs): 54
GSM846538	V010129_I_B	Thyroid FNA, cytology I, histology B	thyroid nodule	indeterminate	benign	female	patient age (yrs): 65
GSM846539	V010130_I_M	Thyroid FNA, cytology I, histology M	thyroid nodule	indeterminate	malignant	female	patient age (yrs): 30
GSM846540	V010131_I_M	Thyroid FNA, cytology I, histology M	thyroid nodule	indeterminate	malignant	female	patient age (yrs): 54
GSM846541	V010132_M_M	Thyroid FNA, cytology M, histology M	thyroid nodule	malignant	malignant	female	patient age (yrs): 47
GSM846542	V010133_B_B	Thyroid FNA, cytology B, histology B	thyroid nodule	benign	benign	male	patient age (yrs): 56
GSM846543	V010134_I_B	Thyroid FNA, cytology I, histology B	thyroid nodule	indeterminate	benign	female	patient age (yrs): 54
GSM846544	V010135_I_M	Thyroid FNA, cytology I, histology M	thyroid nodule	indeterminate	malignant	female	patient age (yrs): 44
GSM846545	V010136_I_M	Thyroid FNA, cytology I, histology M	thyroid nodule	indeterminate	malignant	female	patient age (yrs): 31
GSM846546	V010137_B_B	Thyroid FNA, cytology B, histology B	thyroid nodule	benign	benign	female	patient age (yrs): 48
GSM846547	V010138_I_M	Thyroid FNA, cytology I, histology M	thyroid nodule	indeterminate	malignant	female	patient age (yrs): 62
GSM846548	V010139_I_M	Thyroid FNA, cytology I, histology M	thyroid nodule	indeterminate	malignant	female	patient age (yrs): 36
GSM846549	V010140_M_M	Thyroid FNA, cytology M, histology M	thyroid nodule	malignant	malignant	female	patient age (yrs): 43
GSM846550	V010141_I_B	Thyroid FNA, cytology I, histology B	thyroid nodule	indeterminate	benign	female	patient age (yrs): 49
GSM846551	V010142_I_B	Thyroid FNA, cytology I, histology B	thyroid nodule	indeterminate	benign	female	patient age (yrs): 56
GSM846552	V010143_I_B	Thyroid FNA, cytology I, histology B	thyroid nodule	indeterminate	benign	female	patient age (yrs): 52
GSM846553	V010144_I_B	Thyroid FNA, cytology I, histology B	thyroid nodule	indeterminate	benign	female	patient age (yrs): 49
GSM846554	V010145_B_B	Thyroid FNA, cytology B, histology B	thyroid nodule	benign	benign	female	patient age (yrs): 66
GSM846555	V010146_I_B	Thyroid FNA, cytology I, histology B	thyroid nodule	indeterminate	benign	female	patient age (yrs): 34
GSM846556	V010147_I_B	Thyroid FNA, cytology I, histology B	thyroid nodule	indeterminate	benign	female	patient age (yrs): 26
GSM846557	V010148_M_M	Thyroid FNA, cytology M, histology M	thyroid nodule	malignant	malignant	female	patient age (yrs): 45
GSM846558	V010149_M_M	Thyroid FNA, cytology M, histology M	thyroid nodule	malignant	malignant	female	patient age (yrs): 39
GSM846559	V010150_B_B	Thyroid FNA, cytology B, histology B	thyroid nodule	benign	benign	female	patient age (yrs): 44
GSM846560	V010151_M_M	Thyroid FNA, cytology M, histology M	thyroid nodule	malignant	malignant	female	patient age (yrs): 38
GSM846561	V010152_M_M	Thyroid FNA, cytology M, histology M	thyroid nodule	malignant	malignant	male	patient age (yrs): 49
GSM846562	V010153_B_B	Thyroid FNA, cytology B, histology B	thyroid nodule	benign	benign	female	patient age (yrs): 57
GSM846563	V010154_I_B	Thyroid FNA, cytology I, histology B	thyroid nodule	indeterminate	benign	female	patient age (yrs): 35
GSM846564	V010155_I_B	Thyroid FNA, cytology I, histology B	thyroid nodule	indeterminate	benign	female	patient age (yrs): 51
GSM846565	V010156_I_B	Thyroid FNA, cytology I, histology B	thyroid nodule	indeterminate	benign	female	patient age (yrs): 43
GSM846567	V010158_I_B	Thyroid FNA, cytology I, histology B	thyroid nodule	indeterminate	benign	female	patient age (yrs): 63
GSM846568	V010159_I_M	Thyroid FNA, cytology I, histology M	thyroid nodule	indeterminate	malignant	female	patient age (yrs): 45
GSM846569	V010160_I_B	Thyroid FNA, cytology I, histology B	thyroid nodule	indeterminate	benign	female	patient age (yrs): 52
GSM846570	V010161_I_M	Thyroid FNA, cytology I, histology M	thyroid nodule	indeterminate	malignant	female	patient age (yrs): 39
GSM846571	V010162_I_M	Thyroid FNA, cytology I, histology M	thyroid nodule	indeterminate	malignant	female	patient age (yrs): 33
GSM846572	V010163_B_B	Thyroid FNA, cytology B, histology B	thyroid nodule	benign	benign	female	patient age (yrs): 57
GSM846573	V010164_I_B	Thyroid FNA, cytology I, histology B	thyroid nodule	indeterminate	benign	female	patient age (yrs): 48
GSM846574	V010165_I_B	Thyroid FNA, cytology I, histology B	thyroid nodule	indeterminate	benign	female	patient age (yrs): 45
GSM846575	V010166_I_M	Thyroid FNA, cytology I, histology M	thyroid nodule	indeterminate	malignant	male	patient age (yrs): 69
GSM846576	V010167_I_M	Thyroid FNA, cytology I, histology M	thyroid nodule	indeterminate	malignant	female	patient age (yrs): 51
GSM846577	V010168_I_M	Thyroid FNA, cytology I, histology M	thyroid nodule	indeterminate	malignant	female	patient age (yrs): 53
GSM846578	V010169_I_B	Thyroid FNA, cytology I, histology B	thyroid nodule	indeterminate	benign	female	patient age (yrs): 31
GSM846579	V010170_I_B	Thyroid FNA, cytology I, histology B	thyroid nodule	indeterminate	benign	female	patient age (yrs): 58
GSM846580	V010171_I_M	Thyroid FNA, cytology I, histology M	thyroid nodule	indeterminate	malignant	female	patient age (yrs): 34
GSM846581	V010172_I_M	Thyroid FNA, cytology I, histology M	thyroid nodule	indeterminate	malignant	female	patient age (yrs): 24
GSM846582	V010173_M_M	Thyroid FNA, cytology M, histology M	thyroid nodule	malignant	malignant	male	patient age (yrs): 57
GSM846583	V010174_I_M	Thyroid FNA, cytology I, histology M	thyroid nodule	indeterminate	malignant	female	patient age (yrs): 49
GSM846584	V010175_B_B	Thyroid FNA, cytology B, histology B	thyroid nodule	benign	benign	female	patient age (yrs): 46
GSM846585	V010176_I_B	Thyroid FNA, cytology I, histology B	thyroid nodule	indeterminate	benign	female	patient age (yrs): 69
GSM846586	V010177_I_B	Thyroid FNA, cytology I, histology B	thyroid nodule	indeterminate	benign	female	patient age (yrs): 75
GSM846587	V010178_I_B	Thyroid FNA, cytology I, histology B	thyroid nodule	indeterminate	benign	female	patient age (yrs): 44
GSM846588	V010179_I_B	Thyroid FNA, cytology I, histology B	thyroid nodule	indeterminate	benign	female	patient age (yrs): 60
GSM846589	V010180_I_M	Thyroid FNA, cytology I, histology M	thyroid nodule	indeterminate	malignant	female	patient age (yrs): 41
GSM846590	V010181_I_M	Thyroid FNA, cytology I, histology M	thyroid nodule	indeterminate	malignant	female	patient age (yrs): 48
GSM846591	V010182_I_B	Thyroid FNA, cytology I, histology B	thyroid nodule	indeterminate	benign	male	patient age (yrs): 43
GSM846592	V010183_B_B	Thyroid FNA, cytology B, histology B	thyroid nodule	benign	benign	female	patient age (yrs): 42
GSM846593	V010184_I_M	Thyroid FNA, cytology I, histology M	thyroid nodule	indeterminate	malignant	male	patient age (yrs): 46
GSM846594	V010185_M_M	Thyroid FNA, cytology M, histology M	thyroid nodule	malignant	malignant	male	patient age (yrs): 62
GSM846595	V010186_I_B	Thyroid FNA, cytology I, histology B	thyroid nodule	indeterminate	benign	female	patient age (yrs): 59
GSM846596	V010187_I_B	Thyroid FNA, cytology I, histology B	thyroid nodule	indeterminate	benign	female	patient age (yrs): 33
GSM846597	V010188_I_B	Thyroid FNA, cytology I, histology B	thyroid nodule	indeterminate	benign	female	patient age (yrs): 39
GSM846598	V010189_M_M	Thyroid FNA, cytology M, histology M	thyroid nodule	malignant	malignant	male	patient age (yrs): 53
GSM846599	V010190_M_M	Thyroid FNA, cytology M, histology M	thyroid nodule	malignant	malignant	female	patient age (yrs): 33
GSM846600	V010191_I_B	Thyroid FNA, cytology I, histology B	thyroid nodule	indeterminate	benign	male	patient age (yrs): 45
GSM846601	V010192_I_M	Thyroid FNA, cytology I, histology M	thyroid nodule	indeterminate	malignant	female	patient age (yrs): 56
GSM846602	V010193_I_B	Thyroid FNA, cytology I, histology B	thyroid nodule	indeterminate	benign	female	patient age (yrs): 69
GSM846603	V010194_I_B	Thyroid FNA, cytology I, histology B	thyroid nodule	indeterminate	benign	female	patient age (yrs): 44
GSM846604	V010195_I_B	Thyroid FNA, cytology I, histology B	thyroid nodule	indeterminate	benign	female	patient age (yrs): 56
GSM846605	V010196_I_B	Thyroid FNA, cytology I, histology B	thyroid nodule	indeterminate	benign	female	patient age (yrs): 65
GSM846606	V010197_I_M	Thyroid FNA, cytology I, histology M	thyroid nodule	indeterminate	malignant	female	patient age (yrs): 49
GSM846607	V010198_I_B	Thyroid FNA, cytology I, histology B	thyroid nodule	indeterminate	benign	female	patient age (yrs): 56
GSM846608	V010199_B_M	Thyroid FNA, cytology B, histology M	thyroid nodule	benign	malignant	female	patient age (yrs): 52
GSM846609	V010200_M_M	Thyroid FNA, cytology M, histology M	thyroid nodule	malignant	malignant	female	patient age (yrs): 36
GSM846610	V010201_I_B	Thyroid FNA, cytology I, histology B	thyroid nodule	indeterminate	benign	female	patient age (yrs): 59
GSM846611	V010202_I_B	Thyroid FNA, cytology I, histology B	thyroid nodule	indeterminate	benign	female	patient age (yrs): 33
GSM846612	V010203_B_B	Thyroid FNA, cytology B, histology B	thyroid nodule	benign	benign	female	patient age (yrs): 52
GSM846613	V010204_I_M	Thyroid FNA, cytology I, histology M	thyroid nodule	indeterminate	malignant	female	patient age (yrs): 39
GSM846614	V010205_I_B	Thyroid FNA, cytology I, histology B	thyroid nodule	indeterminate	benign	female	patient age (yrs): 71
GSM846615	V010206_I_B	Thyroid FNA, cytology I, histology B	thyroid nodule	indeterminate	benign	female	patient age (yrs): 41
GSM846616	V010207_I_B	Thyroid FNA, cytology I, histology B	thyroid nodule	indeterminate	benign	female	patient age (yrs): 47
GSM846617	V010208_I_B	Thyroid FNA, cytology I, histology B	thyroid nodule	indeterminate	benign	female	patient age (yrs): 46
GSM846618	V010209_I_M	Thyroid FNA, cytology I, histology M	thyroid nodule	indeterminate	malignant	female	patient age (yrs): 52
GSM846619	V010210_I_B	Thyroid FNA, cytology I, histology B	thyroid nodule	indeterminate	benign	female	patient age (yrs): 68
GSM846620	V010211_I_B	Thyroid FNA, cytology I, histology B	thyroid nodule	indeterminate	benign	female	patient age (yrs): 45
GSM846621	V010212_I_B	Thyroid FNA, cytology I, histology B	thyroid nodule	indeterminate	benign	female	patient age (yrs): 34
GSM846622	V010213_B_M	Thyroid FNA, cytology B, histology M	thyroid nodule	benign	malignant	female	patient age (yrs): 48
GSM846623	V010214_I_M	Thyroid FNA, cytology I, histology M	thyroid nodule	indeterminate	malignant	male	patient age (yrs): 46
GSM846624	V010215_I_B	Thyroid FNA, cytology I, histology B	thyroid nodule	indeterminate	benign	female	patient age (yrs): 58
GSM846625	V010216_B_B	Thyroid FNA, cytology B, histology B	thyroid nodule	benign	benign	male	patient age (yrs): 61
GSM846626	V010217_I_B	Thyroid FNA, cytology I, histology B	thyroid nodule	indeterminate	benign	female	patient age (yrs): 58
GSM846627	V010218_I_M	Thyroid FNA, cytology I, histology M	thyroid nodule	indeterminate	malignant	male	patient age (yrs): 46
GSM846628	V010219_I_M	Thyroid FNA, cytology I, histology M	thyroid nodule	indeterminate	malignant	male	patient age (yrs): 77
GSM846629	V010220_I_B	Thyroid FNA, cytology I, histology B	thyroid nodule	indeterminate	benign	female	patient age (yrs): 75
GSM846630	V010221_I_B	Thyroid FNA, cytology I, histology B	thyroid nodule	indeterminate	benign	female	patient age (yrs): 53
GSM846631	V010222_I_B	Thyroid FNA, cytology I, histology B	thyroid nodule	indeterminate	benign	female	patient age (yrs): 68
GSM846632	V010223_I_B	Thyroid FNA, cytology I, histology B	thyroid nodule	indeterminate	benign	female	patient age (yrs): 22
GSM846633	V010224_B_B	Thyroid FNA, cytology B, histology B	thyroid nodule	benign	benign	female	patient age (yrs): 54
GSM846634	V010225_I_B	Thyroid FNA, cytology I, histology B	thyroid nodule	indeterminate	benign	male	patient age (yrs): 62
GSM846635	V010226_I_B	Thyroid FNA, cytology I, histology B	thyroid nodule	indeterminate	benign	female	patient age (yrs): 82
GSM846636	V010227_I_B	Thyroid FNA, cytology I, histology B	thyroid nodule	indeterminate	benign	male	patient age (yrs): 48
GSM846637	V010228_I_B	Thyroid FNA, cytology I, histology B	thyroid nodule	indeterminate	benign	female	patient age (yrs): 26
GSM846638	V010229_B_B	Thyroid FNA, cytology B, histology B	thyroid nodule	benign	benign	female	patient age (yrs): 61
GSM846639	V010230_I_B	Thyroid FNA, cytology I, histology B	thyroid nodule	indeterminate	benign	female	patient age (yrs): 39
GSM846640	V010231_M_M	Thyroid FNA, cytology M, histology M	thyroid nodule	malignant	malignant	male	patient age (yrs): 26
GSM846641	V010232_I_B	Thyroid FNA, cytology I, histology B	thyroid nodule	indeterminate	benign	female	patient age (yrs): 78
GSM846642	V010233_M_M	Thyroid FNA, cytology M, histology M	thyroid nodule	malignant	malignant	female	patient age (yrs): 46
GSM846643	V010234_I_B	Thyroid FNA, cytology I, histology B	thyroid nodule	indeterminate	benign	female	patient age (yrs): 54
GSM846644	V010235_I_B	Thyroid FNA, cytology I, histology B	thyroid nodule	indeterminate	benign	female	patient age (yrs): 58
GSM846645	V010236_I_M	Thyroid FNA, cytology I, histology M	thyroid nodule	indeterminate	malignant	female	patient age (yrs): 57
GSM846646	V010237_I_B	Thyroid FNA, cytology I, histology B	thyroid nodule	indeterminate	benign	male	patient age (yrs): 79
GSM846647	V010238_I_M	Thyroid FNA, cytology I, histology M	thyroid nodule	indeterminate	malignant	female	patient age (yrs): 52
GSM846648	V010239_I_B	Thyroid FNA, cytology I, histology B	thyroid nodule	indeterminate	benign	male	patient age (yrs): 52
GSM846649	V010240_M_M	Thyroid FNA, cytology M, histology M	thyroid nodule	malignant	malignant	female	patient age (yrs): 59
GSM846650	V010241_I_B	Thyroid FNA, cytology I, histology B	thyroid nodule	indeterminate	benign	female	patient age (yrs): 26
GSM846651	V010242_I_B	Thyroid FNA, cytology I, histology B	thyroid nodule	indeterminate	benign	female	patient age (yrs): 50
GSM846652	V010243_I_B	Thyroid FNA, cytology I, histology B	thyroid nodule	indeterminate	benign	male	patient age (yrs): 42
GSM846653	V010244_I_B	Thyroid FNA, cytology I, histology B	thyroid nodule	indeterminate	benign	female	patient age (yrs): 46
GSM846654	V010245_M_M	Thyroid FNA, cytology M, histology M	thyroid nodule	malignant	malignant	female	patient age (yrs): 71
GSM846655	V010246_I_B	Thyroid FNA, cytology I, histology B	thyroid nodule	indeterminate	benign	female	patient age (yrs): 71
GSM846656	V010247_I_B	Thyroid FNA, cytology I, histology B	thyroid nodule	indeterminate	benign	female	patient age (yrs): 59
GSM846657	V010248_I_B	Thyroid FNA, cytology I, histology B	thyroid nodule	indeterminate	benign	female	patient age (yrs): 62
GSM846658	V010249_B_B	Thyroid FNA, cytology B, histology B	thyroid nodule	benign	benign	female	patient age (yrs): 30
GSM846659	V010250_I_B	Thyroid FNA, cytology I, histology B	thyroid nodule	indeterminate	benign	female	patient age (yrs): 84
GSM846660	V010251_I_B	Thyroid FNA, cytology I, histology B	thyroid nodule	indeterminate	benign	female	patient age (yrs): 45
GSM846661	V010252_I_B	Thyroid FNA, cytology I, histology B	thyroid nodule	indeterminate	benign	male	patient age (yrs): 37
GSM846662	V010253_I_B	Thyroid FNA, cytology I, histology B	thyroid nodule	indeterminate	benign	female	patient age (yrs): 40
GSM846663	V010254_I_M	Thyroid FNA, cytology I, histology M	thyroid nodule	indeterminate	malignant	female	patient age (yrs): 45
GSM846664	V010255_I_B	Thyroid FNA, cytology I, histology B	thyroid nodule	indeterminate	benign	male	patient age (yrs): 37
GSM846665	V010256_I_B	Thyroid FNA, cytology I, histology B	thyroid nodule	indeterminate	benign	female	patient age (yrs): 46
GSM846666	V010257_I_B	Thyroid FNA, cytology I, histology B	thyroid nodule	indeterminate	benign	male	patient age (yrs): 61
GSM846667	V010258_I_B	Thyroid FNA, cytology I, histology B	thyroid nodule	indeterminate	benign	female	patient age (yrs): 53
GSM846668	V010259_I_M	Thyroid FNA, cytology I, histology M	thyroid nodule	indeterminate	malignant	female	patient age (yrs): 61
GSM846669	V010260_B_B	Thyroid FNA, cytology B, histology B	thyroid nodule	benign	benign	male	patient age (yrs): 35
GSM846670	V010261_I_B	Thyroid FNA, cytology I, histology B	thyroid nodule	indeterminate	benign	female	patient age (yrs): 60
GSM846671	V010262_M_M	Thyroid FNA, cytology M, histology M	thyroid nodule	malignant	malignant	female	patient age (yrs): 28
GSM846672	V010263_B_B	Thyroid FNA, cytology B, histology B	thyroid nodule	benign	benign	female	patient age (yrs): 60
GSM846673	V010264_I_B	Thyroid FNA, cytology I, histology B	thyroid nodule	indeterminate	benign	female	patient age (yrs): 56
GSM846674	V010265_M_M	Thyroid FNA, cytology M, histology M	thyroid nodule	malignant	malignant	female	patient age (yrs): 42
GSM846675	V010266_M_M	Thyroid FNA, cytology M, histology M	thyroid nodule	malignant	malignant	female	patient age (yrs): 31
GSM846676	V010267_I_M	Thyroid FNA, cytology I, histology M	thyroid nodule	indeterminate	malignant	female	patient age (yrs): 42
GSM846677	V010268_I_B	Thyroid FNA, cytology I, histology B	thyroid nodule	indeterminate	benign	female	patient age (yrs): 46
GSM846678	V010269_I_B	Thyroid FNA, cytology I, histology B	thyroid nodule	indeterminate	benign	female	patient age (yrs): 33
GSM846679	V010270_I_M	Thyroid FNA, cytology I, histology M	thyroid nodule	indeterminate	malignant	female	patient age (yrs): 43
GSM846680	V010271_B_B	Thyroid FNA, cytology B, histology B	thyroid nodule	benign	benign	female	patient age (yrs): 48
GSM846681	V010272_I_B	Thyroid FNA, cytology I, histology B	thyroid nodule	indeterminate	benign	female	patient age (yrs): 58
GSM846682	V010273_I_B	Thyroid FNA, cytology I, histology B	thyroid nodule	indeterminate	benign	male	patient age (yrs): 38
GSM846683	V010274_I_M	Thyroid FNA, cytology I, histology M	thyroid nodule	indeterminate	malignant	female	patient age (yrs): 54
GSM846684	V010275_M_M	Thyroid FNA, cytology M, histology M	thyroid nodule	malignant	malignant	female	patient age (yrs): 38
GSM846685	V010276_M_M	Thyroid FNA, cytology M, histology M	thyroid nodule	malignant	malignant	female	patient age (yrs): 78
GSM846686	V010277_I_B	Thyroid FNA, cytology I, histology B	thyroid nodule	indeterminate	benign	female	patient age (yrs): 61
GSM846687	V010278_B_M	Thyroid FNA, cytology B, histology M	thyroid nodule	benign	malignant	male	patient age (yrs): 46
GSM846688	V010279_I_B	Thyroid FNA, cytology I, histology B	thyroid nodule	indeterminate	benign	female	patient age (yrs): 47
GSM846689	V010280_I_M	Thyroid FNA, cytology I, histology M	thyroid nodule	indeterminate	malignant	male	patient age (yrs): 53
GSM846690	V010281_I_B	Thyroid FNA, cytology I, histology B	thyroid nodule	indeterminate	benign	male	patient age (yrs): 67
GSM846691	V010282_I_B	Thyroid FNA, cytology I, histology B	thyroid nodule	indeterminate	benign	female	patient age (yrs): 71
GSM846692	V010283_I_B	Thyroid FNA, cytology I, histology B	thyroid nodule	indeterminate	benign	male	patient age (yrs): 38
GSM846693	V010284_I_B	Thyroid FNA, cytology I, histology B	thyroid nodule	indeterminate	benign	female	patient age (yrs): 63
GSM846694	V010285_I_M	Thyroid FNA, cytology I, histology M	thyroid nodule	indeterminate	malignant	female	patient age (yrs): 60
GSM846695	V010286_I_M	Thyroid FNA, cytology I, histology M	thyroid nodule	indeterminate	malignant	female	patient age (yrs): 55
GSM846696	V010287_M_M	Thyroid FNA, cytology M, histology M	thyroid nodule	malignant	malignant	male	patient age (yrs): 43
GSM846697	V010288_I_M	Thyroid FNA, cytology I, histology M	thyroid nodule	indeterminate	malignant	male	patient age (yrs): 73
GSM846698	V010289_B_B	Thyroid FNA, cytology B, histology B	thyroid nodule	benign	benign	female	patient age (yrs): 51
GSM846699	V010290_I_B	Thyroid FNA, cytology I, histology B	thyroid nodule	indeterminate	benign	female	patient age (yrs): 59
GSM846700	V010291_I_B	Thyroid FNA, cytology I, histology B	thyroid nodule	indeterminate	benign	female	patient age (yrs): 50
GSM846701	V010292_B_B	Thyroid FNA, cytology B, histology B	thyroid nodule	benign	benign	female	patient age (yrs): 55
GSM846702	V010293_M_M	Thyroid FNA, cytology M, histology M	thyroid nodule	malignant	malignant	male	patient age (yrs): 48
GSM846703	V010294_I_M	Thyroid FNA, cytology I, histology M	thyroid nodule	indeterminate	malignant	male	patient age (yrs): 59
GSM846704	V010295_I_B	Thyroid FNA, cytology I, histology B	thyroid nodule	indeterminate	benign	female	patient age (yrs): 24
GSM846705	V010296_I_B	Thyroid FNA, cytology I, histology B	thyroid nodule	indeterminate	benign	female	patient age (yrs): 37
GSM846706	V010297_I_M	Thyroid FNA, cytology I, histology M	thyroid nodule	indeterminate	malignant	female	patient age (yrs): 57
GSM846707	V010298_I_B	Thyroid FNA, cytology I, histology B	thyroid nodule	indeterminate	benign	female	patient age (yrs): 50
GSM846708	V010299_I_B	Thyroid FNA, cytology I, histology B	thyroid nodule	indeterminate	benign	male	patient age (yrs): 51
GSM846709	V010300_I_B	Thyroid FNA, cytology I, histology B	thyroid nodule	indeterminate	benign	female	patient age (yrs): 38
GSM846710	V010301_I_M	Thyroid FNA, cytology I, histology M	thyroid nodule	indeterminate	malignant	female	patient age (yrs): 66
GSM846711	V010302_M_M	Thyroid FNA, cytology M, histology M	thyroid nodule	malignant	malignant	male	patient age (yrs): 65
GSM846712	V010303_I_B	Thyroid FNA, cytology I, histology B	thyroid nodule	indeterminate	benign	male	patient age (yrs): 59
GSM846713	V010304_I_M	Thyroid FNA, cytology I, histology M	thyroid nodule	indeterminate	malignant	male	patient age (yrs): 37
GSM846714	V010305_I_B	Thyroid FNA, cytology I, histology B	thyroid nodule	indeterminate	benign	female	patient age (yrs): 52
GSM846715	V010306_I_B	Thyroid FNA, cytology I, histology B	thyroid nodule	indeterminate	benign	female	patient age (yrs): 76
GSM846716	V010307_I_B	Thyroid FNA, cytology I, histology B	thyroid nodule	indeterminate	benign	female	patient age (yrs): 53
GSM846717	V010308_I_M	Thyroid FNA, cytology I, histology M	thyroid nodule	indeterminate	malignant	female	patient age (yrs): 59
GSM846718	V010309_B_B	Thyroid FNA, cytology B, histology B	thyroid nodule	benign	benign	female	patient age (yrs): 60
GSM846719	V010310_I_M	Thyroid FNA, cytology I, histology M	thyroid nodule	indeterminate	malignant	female	patient age (yrs): 46
GSM846720	V010311_I_B	Thyroid FNA, cytology I, histology B	thyroid nodule	indeterminate	benign	male	patient age (yrs): 58
GSM846721	V010312_I_M	Thyroid FNA, cytology I, histology M	thyroid nodule	indeterminate	malignant	female	patient age (yrs): 57
GSM846722	V010313_B_B	Thyroid FNA, cytology B, histology B	thyroid nodule	benign	benign	female	patient age (yrs): 39
GSM846723	V010314_I_B	Thyroid FNA, cytology I, histology B	thyroid nodule	indeterminate	benign	male	patient age (yrs): 47
GSM846724	V010315_I_B	Thyroid FNA, cytology I, histology B	thyroid nodule	indeterminate	benign	male	patient age (yrs): 42
GSM846725	V010316_M_M	Thyroid FNA, cytology M, histology M	thyroid nodule	malignant	malignant	female	patient age (yrs): 35
GSM846726	V010317_I_B	Thyroid FNA, cytology I, histology B	thyroid nodule	indeterminate	benign	female	patient age (yrs): 51
GSM846727	V010318_I_B	Thyroid FNA, cytology I, histology B	thyroid nodule	indeterminate	benign	female	patient age (yrs): 58
GSM846728	V010319_B_B	Thyroid FNA, cytology B, histology B	thyroid nodule	benign	benign	female	patient age (yrs): 77
